# Supplementary material for: A deep convolutional neural network for classification of red blood cells in sickle cell anemia
Source: PubMed Central journal article supplement (PMC5654260; doi:10.1371/journal.pcbi.1005746), 2017-10-19
Supplement: pcbi.1005746.s002.pdf [file pcbi.1005746.s002.pdf]

## Appendix S2. Automatic RBC shape factor quantification

In this work we conducted RBC shape quantification after the RBCs were classified by the deep CNN into their respective categories. We divided the shape factors into three main types: Elliptical, Regional and Derived shape factors. Table S1 describes the complete shape factors and their formulas, and Table S2 gives a pseudo-code for the RBC shape analysis method. It consists of four main steps:

- Load the RBC image to be analyzed (line 3);
- RBC outline detection for the RBC images (line 5);
- Calculate three kinds of shape factors (line 6 to 16);
- Save the calculated shape factor result into excel file (line 18 to 20).

In particular, *segOutline* is a function that implements the RBC segmentation by using the method described in Section B of the main text. The outputs RBC outline image (*Bw*) and binary label image (*L*) correspond to the extracted RBC outline and label image; *calRegionprops* is a function for calculating the regional properties (*Area\_r*, *Perm\_r*, *Area\_c* and *Perm\_c*) of binary RBC mask image *L*; *calFeretDiameter* is applied to calculate the *maxFD* and *minFD*; *fitEllipse* is a function conducting ellipse fitting for the RBC contour, so as to generate the ellipse shape factors (*Rb*, *Ra*,  $\theta$  and *Centroid*). The other 7 shape factors in Table S1 are derived from the regional shape indices and elliptical fitting shape indices. Finally, all the calculated 14 shape factors are appended into a structure type variable *F* through the *appendFactors* function for each RBC, and *save2Excelfile* is used to save all RBCs shape factor values into a single excel file.

Table S1: Comparisons of loss and train errors based on different iterations.

| Types of Shape factors          | Shape factors                                                         | Formula                                                     |
|---------------------------------|-----------------------------------------------------------------------|-------------------------------------------------------------|
| <b>Elliptical shape factors</b> | Short axis( <i>Rb</i> )                                               | Based on the fitted ellipse result                          |
|                                 | long axis( <i>Ra</i> )                                                |                                                             |
|                                 | rotation angle ( $\theta$ )                                           |                                                             |
| <b>Regional shape factors</b>   | centroid                                                              | Based on the fitted ellipse and convex hull polygon results |
|                                 | segmented area and perimeter of RBC ( <i>Area_r</i> , <i>Perm_r</i> ) |                                                             |
|                                 | convex area and perimeter ( <i>Area_c</i> , <i>Perm_c</i> )           |                                                             |
|                                 | maximum Feret diameter ( <i>maxFD</i> )                               |                                                             |
|                                 | minimum Feret diameter ( <i>minFD</i> )                               |                                                             |
| <b>Derived shape factors</b>    | Elliptical shape factor( <i>ESF</i> )                                 | $CSF = 4\pi * Area_r / Perm_r^2$                            |
|                                 | Circular shape factor( <i>CSF</i> )                                   | $ESF = Rb / Ra$                                             |
|                                 | SF1                                                                   | $SF1 = Rb / max\_FD$                                        |
|                                 | SF2                                                                   | $SF2 = min\_FD / max\_FD$                                   |
|                                 | Elongation                                                            | $Elongation = max\_FD / min\_FD$                            |
|                                 | Convexity                                                             | $conv = \sqrt{Area_r / Area_c}$                             |
|                                 | Compactness                                                           | $compt = 4\pi * Area_r / Perm_c^2$                          |

**Table S2. Illustration of the pseudocode for RBC shape analysis.**

---

**Algorithm 1: RBC\_ShapeAnalysis**

---

**input** : RBC patch image location  $P$

**output**: Shape factors  $F$

```
1 begin
2    $rowstart \leftarrow 1$ 
3    $[patch\_img, cell\_counter, patch\_name] \leftarrow load\_data(P)$ 
4   for  $i \in cell\_counter$  do
5      $[Bw, L] \leftarrow segOutline(patch\_img\{i\})$ 
6      $[Area\_r, Perm\_r, Area\_c, Perm\_c] \leftarrow calRegionprops(L)$ 
7      $[maxFD, minFD] \leftarrow calFeretDiameter(L)$ 
8      $point\_list \leftarrow find(Bw == 0)$ 
9      $[centroid, Ra, Rb, \theta] \leftarrow fitEllipse(point\_list)$ 
10     $ESF \leftarrow Rb/Ra$ 
11     $CSF \leftarrow (4\pi Area\_r)/Perm\_r^2$ 
12     $SF1 \leftarrow Rb/maxFD$ 
13     $SF2 \leftarrow minFD/maxFD$ 
14     $Elongation \leftarrow maxFD/minFD$ 
15     $Conv \leftarrow \sqrt{Area\_r/Area\_c}$ 
16     $Compt \leftarrow (4\pi Area\_r)/Perm\_c^2$ 
17     $F[i].factors \leftarrow appendFactors(centroid, Ra, Rb, \theta, ESF, CSF,$ 
       $Perm\_r, maxFD, minFD, SF1, SF2, Elongation, Conv, Compt);$ 
18  for  $i \in cell\_counter$  do
19     $save2ExcelFile(F[i].factors, rowstart, patch\_name[i])$ 
20     $rowstart \leftarrow rowstart + 1$ 
```

---
